# Supplementary material for: Integration by design: Driving mineral system knowledge using multi modal, collocated, scale-consistent characterization
Source: Copernicus journal article supplement (doi:10.5194/essd-2023-464), 2024-02-20

## HenkelPlot QFC-FM-Magnetite Template

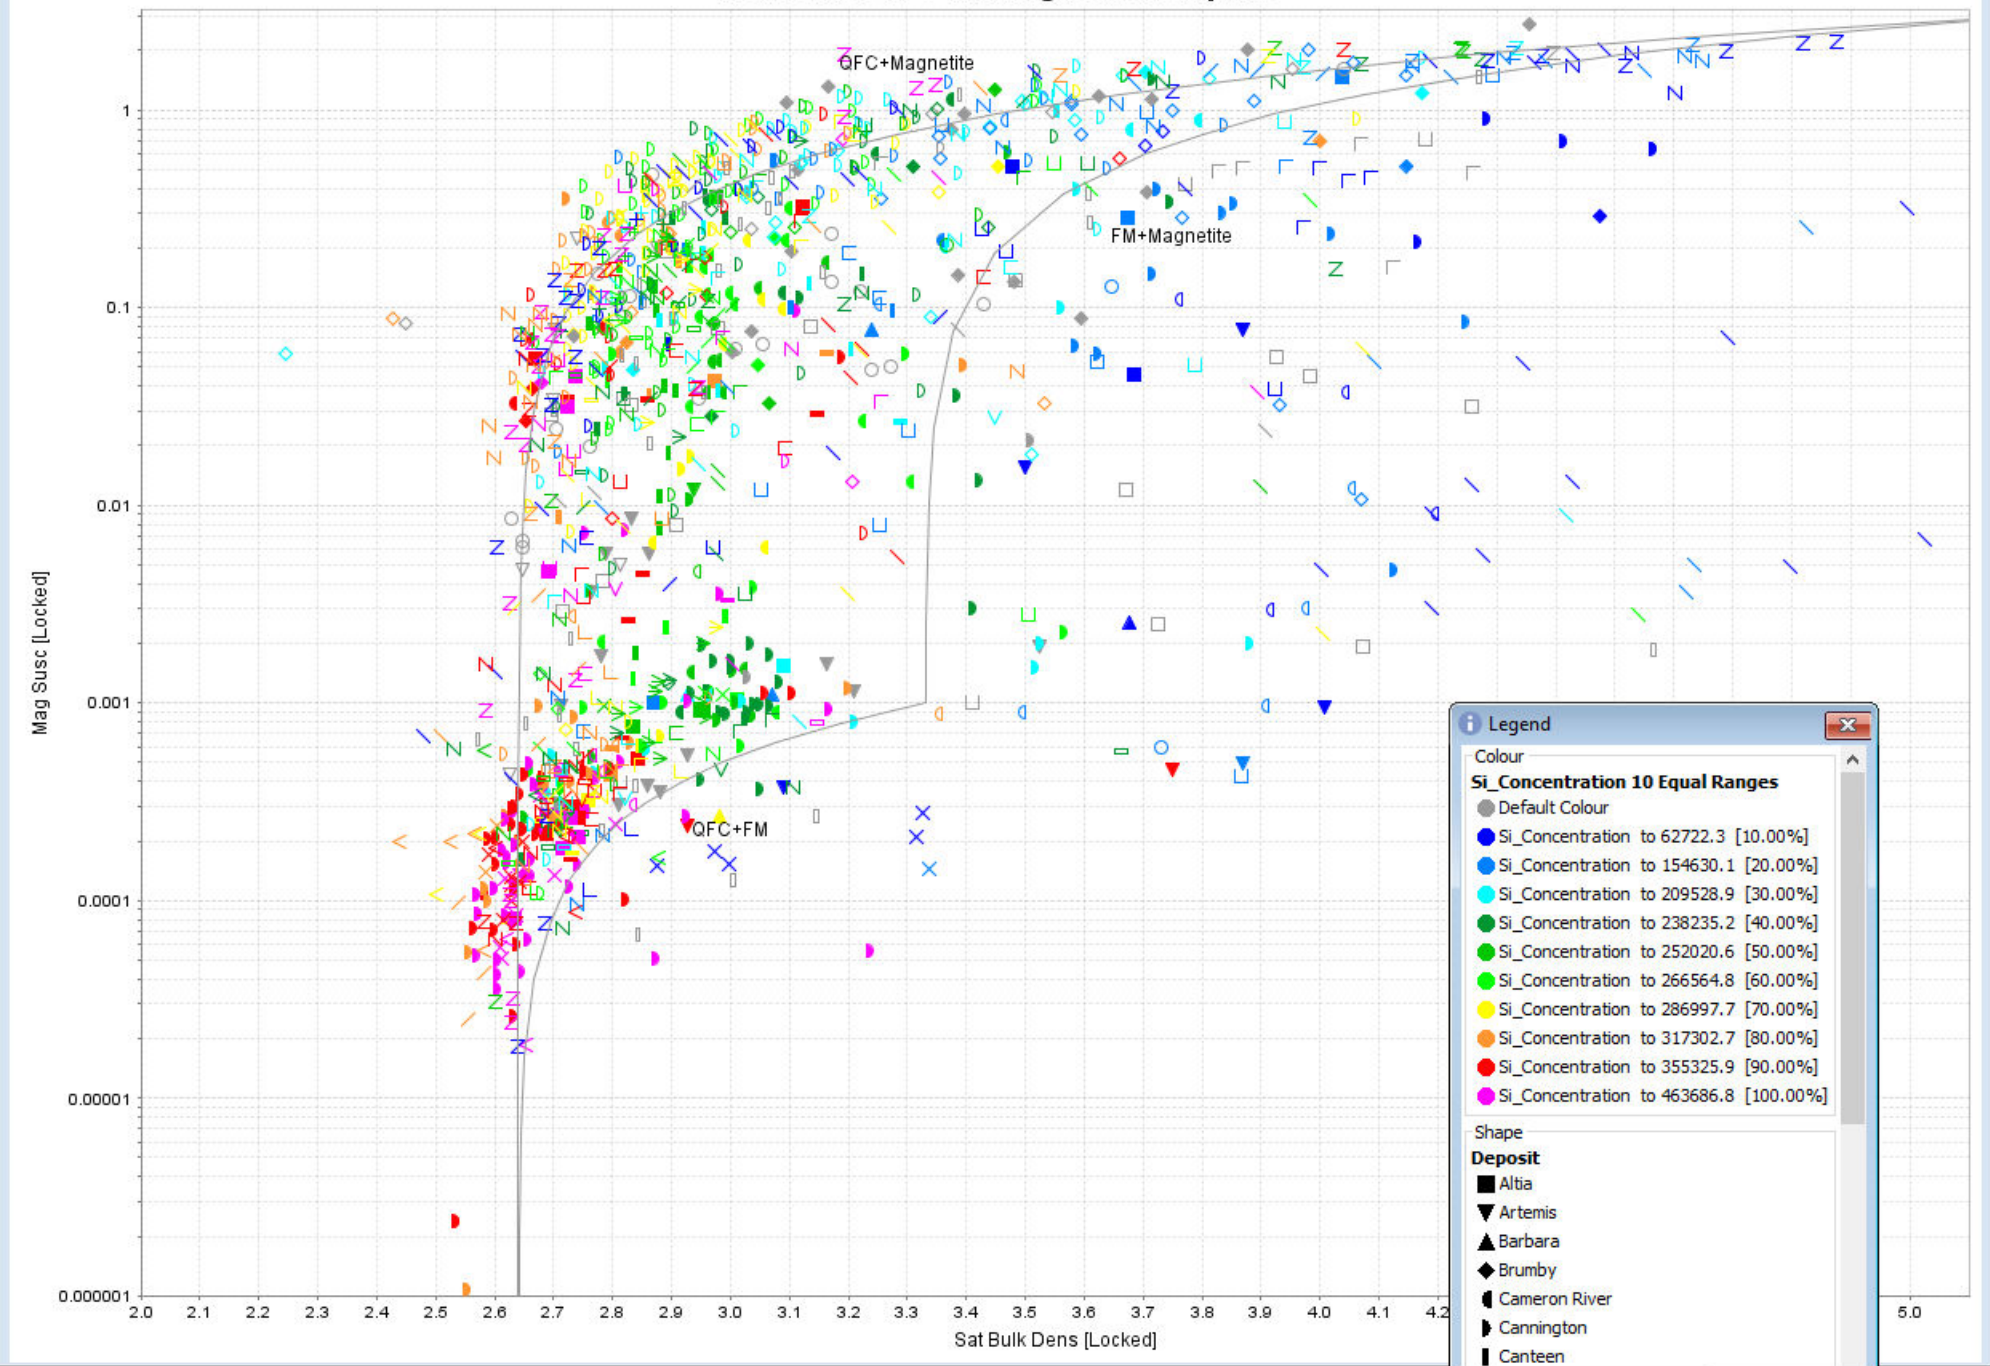

Supplement: Supplementary file [file essd-2023-464-RC1-supplement.pdf]
